## 1 RAPID TURNOVER OF LIFE-CYCLE-RELATED GENES IN THE BROWN ALGAE

2 A.P. Lipinska<sup>1</sup>, M.L. Serrano-Serrano<sup>2</sup>, Akira F. Peters<sup>3</sup>, K. Kogame<sup>4</sup>, J Mark Cock<sup>1</sup>, Susana M.  
3 Coelho<sup>1\*</sup>

4  
5 <sup>1</sup>Sorbonne Université, UPMC Univ Paris 06, CNRS, Algal Genetics Group, Integrative Biology of Marine  
6 Models, Station Biologique de Roscoff, CS 90074, F-29688, Roscoff, France. <sup>2</sup>Department of Ecology and  
7 Evolution, University of Lausanne, 1015 Lausanne, Switzerland <sup>3</sup>Bezhin Rosko, 29250 Santec, France.

8 <sup>4</sup>Department of Biological Sciences, Faculty of Sciences, Hokkaido University, Sapporo, 060-0810 Japan

9 \*correspondence: coelho@sb-roscoff.fr

## 10 ABSTRACT

11 **Background:** Sexual life cycles in eukaryotes involve a cyclic alternation between haploid and  
12 diploid phases. While most animals possess a diploid life cycle, plants and algae alternate between  
13 multicellular haploid (gametophyte) and diploid (sporophyte) generations. In many algae,  
14 gametophytes and sporophytes are independent and free living, and may present dramatic  
15 phenotypic differences. The same shared genome can therefore be subject to different, even  
16 conflicting, selection pressures in each of the life cycle generations. Here, we have analysed the  
17 nature and extent of genome-wide generation-biased gene expression in four species of brown  
18 algae with contrasting levels of dimorphism between life cycle generations, in order to assess the  
19 potential role of generation-specific selection in shaping patterns of gene expression and  
20 divergence.

21 **Results:** We show that the proportion of the transcriptome that is generation-biased is  
22 associated with the level of phenotypic dimorphism between the life cycle stages. Importantly, our  
23 data reveals a remarkably high turnover rate for life-cycle-related gene sets across the brown algae  
24 and highlights the importance not only of co-option of regulatory programs from one generation  
25 to the other but also a key role for newly emerged, lineage-specific genes in the evolution of the

26 gametophyte and sporophyte developmental programs in this major eukaryotic group. Moreover,  
27 we show that generation-biased genes display distinct evolutionary modes, with gametophyte-  
28 biased genes evolving rapidly at the coding sequence level whereas sporophyte-biased genes  
29 exhibit changes in their patterns of expression.

30 **Conclusion:** Our analysis uncovers the characteristics, expression patterns and evolution of  
31 generation-biased genes and underline the selective forces that shape this previously  
32 underappreciated source of phenotypic diversity.

### 33 BACKGROUND

34 As a consequence of sexual reproduction, the vast majority of eukaryotes have life cycles  
35 involving an alternation between haploid and diploid phases [1,2]. The proportion of the life cycle  
36 spent in each phase varies dramatically depending on the species. In organisms with haplontic  
37 cycles, mitosis only occurs in the haploid stage. Haploid mitosis may lead to asexual (clonal)  
38 reproduction such as the case of *Chlamydomonas*, or involve somatic growth and cellular  
39 differentiation such as in *Volvox*. In these organisms, the zygote undergoes meiosis immediately  
40 after syngamy without undergoing any mitotic divisions. Conversely, in diplontic life cycles, mitosis  
41 only occurs during the diploid phase, and meiosis takes place immediately before gamete  
42 formation. Diploid mitosis leads to asexual reproduction in unicellular lineages (e.g. diatoms) and  
43 to somatic growth and differentiation in multicellular organisms such as Metazoans. Finally, in  
44 organisms with haploid-diploid life cycles, mitotic cell divisions occur during both the haploid and  
45 diploid phases. In land plants and some algae, these mitotic divisions can lead to the development  
46 of two distinct multicellular organisms, one haploid and the other diploid. The haploid organism is

47 generally referred to as the gametophyte, because it produces gametes, and the diploid organism  
48 as the sporophyte, because it produces spores. Note, however, that the gametophyte and  
49 sporophyte developmental programs are not absolutely linked to ploidy because ploidy and life  
50 cycle generation have been shown to be uncoupled during variant life cycles [3,4]. The  
51 gametophyte and sporophyte should therefore be thought of as genetically-controlled  
52 developmental programs that are coordinated with, but not absolutely linked to, life cycle  
53 progression.

54         The evolutionary advantages of life cycles with dominant haploid, dominant diploid, or  
55 alternation between two phases have been subject to extensive theoretical work [5–10]. Models  
56 exploring the evolution of haploidy and diploidy assume an alternation of generations with free-  
57 living haploid and diploid phases, where expanding one phase reduces the other phase. These  
58 models predict that purging of deleterious mutations favours expansion of the haploid phase when  
59 recombination is rare, but that diploids are favoured when recombination is common because they  
60 mask mutations from selection [6,11]. In contrast, niche differentiation between haploids and  
61 diploids may favour the maintenance of biphasic life cycles, in which development occurs in both  
62 phases [12]. For instance, gametophytes have been shown to exploit low-resource environments  
63 more efficiently whereas sporophytes are more vigorous when resources are abundant [13]. The  
64 interplay between genetic and ecological factors has been recently explored [7], in a model that  
65 assumes different effects of mutations in haploids and diploids and competition between  
66 individuals within a generation. The model predicts that temporal variations in ecological niches  
67 stabilize alternation of generations. Empirical support for these models has come from the brown

68 alga *Ectocarpus* sp., where dimorphism between generations has been linked to the occupation of  
69 different spatio-temporal niches [14].

70 In organisms with complex life cycles, an allele may be relatively beneficial when expressed  
71 in one generation but deleterious when expressed in the other generation (generation-  
72 antagonism), and in this case selection acts in opposite directions in haploids and diploids [7,15].  
73 With this type of generation-dependent antagonistic selection, evolution favours the expansion of  
74 whichever generation gains the greatest fitness advantage, on average, from the conflicting  
75 selection pressures [15]. Generation antagonism is expected to be particularly relevant in  
76 multicellular species where there is alternation of generations with morphologically dissimilar  
77 gametophytes and sporophytes, as in the case of many plants and algae. When fitness optima differ  
78 between the gametophyte and sporophyte generations for a shared trait, dimorphism can allow  
79 each generation to express its optimum trait phenotype. Accordingly, the evolution of generation-  
80 biased gene expression may be one mechanism that could help to resolve this intra-locus  
81 'generation' conflict, in a similar manner to mechanisms that resolve sexual antagonism [16,17].  
82 Another potential solution to resolve generation-conflict is gene duplication, followed by  
83 divergence of the two loci towards distinct optima corresponding to each of the two generations.  
84 An equivalent process has been shown to be important in the generation of sex-biased gene  
85 expression [17,18]. While the role of sexual selection in shaping phenotypic diversity and in driving  
86 patterns of evolution of gene expression has been studied extensively (e.g. [19,20]), we have  
87 remained so far largely ignorant about the relationships between generation-biased selection,  
88 generation-biased gene expression and phenotypic differentiation.

89           The brown algae (Phaeophyceae) are a group of complex multicellular eukaryotes that  
90   diverged from plants and animals more than a billion years. Brown algal life cycles are  
91   extraordinarily diverse, exhibiting a broad range of variation in terms of the relative complexities of  
92   the gametophyte and sporophyte generations [21]. Here, we selected two pairs of brown algal  
93   species from the orders Ectocarpales and Laminariales, which diverged about 95 Mya [22], to trace  
94   the evolutionary history of generation-biased gene expression in the brown algal lineage. The  
95   selected species exhibit markedly different levels of dimorphism between life cycle generations:  
96   the Laminariales species *Macrocystis pyrifera* and *Saccharina japonica* have complex sporophyte  
97   but highly reduced gametophyte generations, whereas the Ectocarpales species include  
98   *Scytosiphon lomentaria*, which has a reduced sporophyte but a morphologically complex  
99   gametophyte, and *Ectocarpus* sp. which has gametophyte and sporophyte generations of similar  
100   complexity. We show that a large proportion of the transcriptome of brown algae exhibit  
101   generation-biased expression, and that the set of life-cycle-biased genes turns over extremely  
102   rapidly during evolution due to a combination of two processes: *de novo* birth of genes with  
103   generation-biased expression and gain/loss of generation-biased expression by orthologous loci.  
104   Our results uncover the characteristics, expression patterns and evolution of generation-biased  
105   genes and underline the selective forces that shape this previously underappreciated source of  
106   phenotypic diversity.

## 107           **RESULTS**

### 108           **Measures of phenotypic differentiation between gametophyte and sporophyte generations**

109           The number of different cell types in each generation and the ratios of the sizes of the  
110 gametophyte and the sporophyte at maturity were used as proxies to assess the degree of  
111 morphological complexity and the level of phenotypic dimorphism between life cycle generations  
112 in the four brown algal species studied (Table S1). Using these parameters, the Laminariales species  
113 *M. pyrifera* and *S. japonica* exhibited the highest level of phenotypic differentiation between  
114 generations, with the sporophyte being more complex than the gametophyte, both in terms of  
115 number of cell types and in terms of the size. As far as the Ectocarpales species were concerned,  
116 dimorphism between generations were also marked in *S. lomentaria*, but with the gametophyte  
117 being more complex than the sporophyte. *Ectocarpus* sp. exhibited the lowest level of  
118 differentiation between the gametophyte and sporophyte generation (Table S1; Figure S1).

#### 119           **Patterns of generation-biased gene expression in gametophytes and sporophytes**

120           We used DEseq2 to compare patterns of gene expression in gametophytes and sporophytes  
121 for each of the four brown algal species. The highest level of generation-biased gene expression  
122 was detected in *M. pyrifera*, where 46% of the transcriptome was generation-biased. Generation-  
123 biased genes represented 37%, 36% and 35% of the transcriptomes of *S. lomentaria*, *S. japonica*  
124 and *Ectocarpus* sp., respectively (Figure 1A). In general, more transcripts were gametophyte-biased  
125 than sporophyte-biased. This difference was most marked in *S. lomentaria*, where almost twice as  
126 many genes were gametophyte-biased (27% of the transcriptome) than were sporophyte-biased.  
127 In both *Ectocarpus* sp. and *S. lomentaria*, the fraction of sporophyte-biased transcripts was  
128 relatively low (12%) but the proportion was higher in species that have a more conspicuous  
129 sporophyte generation (i.e., both Laminariales), with 19-22% of the transcriptome being  
130 sporophyte-biased (Figure 1A).

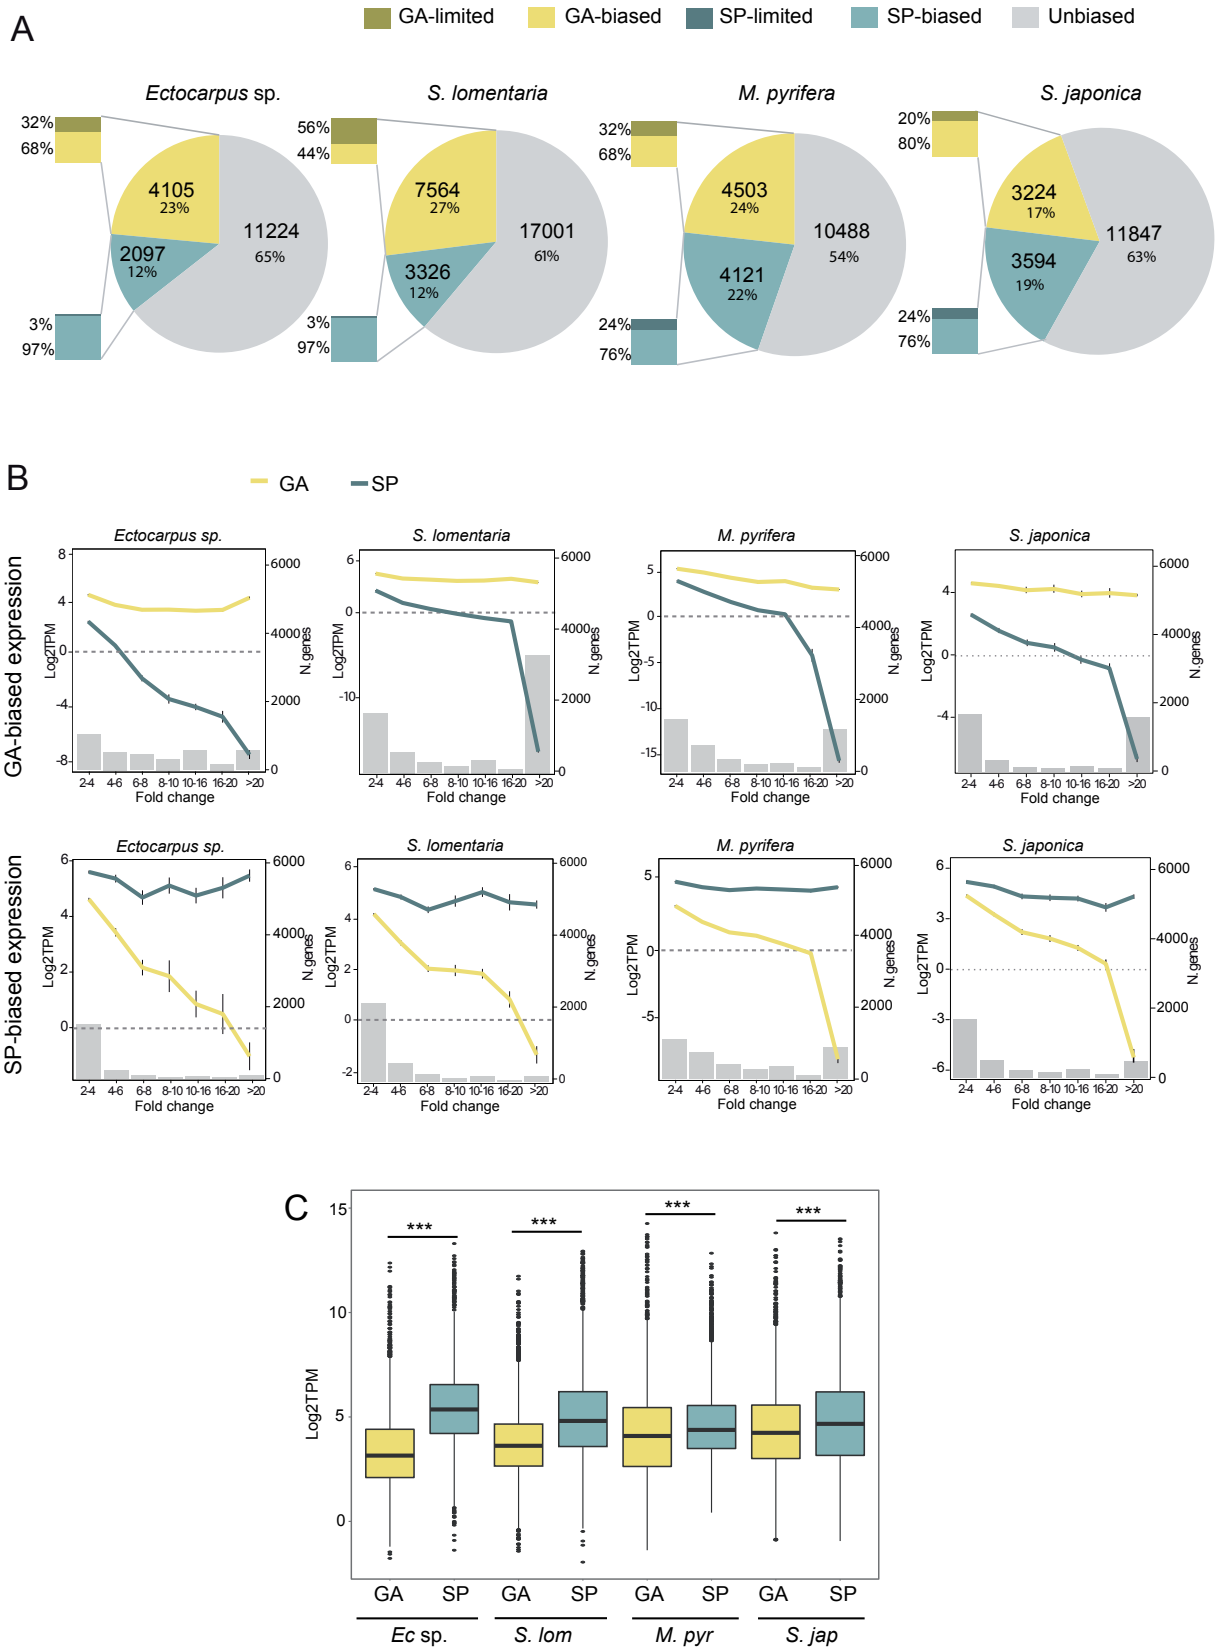

Figure 1. Generation-biased gene expression across the four-brown algal species. (A) Proportion of unbiased, gametophyte- and sporophyte-biased genes across the four-studied species. Bar inserts represent the proportion of generation-specific genes among the generation-biased genes in each species. (B) Mean gene expression levels ( $\log_2\text{TPM}$ ) at several degrees of generation-bias (fold change, FC, represented by grey histograms) for gametophyte-biased (yellow) and sporophyte-biased (blue) genes in the four-studied species. The number of genes in each category of FC are represented in the right side of the graph. Error bars represent standard errors. GA: gametophyte; SP: sporophyte. (C) Boxplot showing the mean expression levels ( $\log_2\text{TPM}$ ) of gametophyte- and sporophyte-biased genes.

132  
133           Generation-biased genes were defined as being generation-limited when the TPM for one of  
134 the two generations was below the 5<sup>th</sup> percentile (see Methods) (Figure 1A). Between 35% and  
135 59% of the generation-biased genes were generation-limited, depending on the species. The  
136 proportion of generation-limited genes was larger for the gametophyte than for the sporophyte  
137 generation in *Ectocarpus* sp. and *S. lomentaria*. This trend was particularly marked for *S. lomentaria*  
138 (which has a dominant gametophyte generation) where more than half of the gametophyte-biased  
139 genes were gametophyte-limited. In contrast, in the two Laminariales species, similar proportions  
140 of generation-limited genes were observed in both generations (Figure 1A).

141           To examine the relationship between degree of generation-biased expression and transcript  
142 abundance (expression level), the generation-biased genes were grouped according to the fold  
143 change (FC) difference between gametophyte and sporophyte samples, and the mean expression  
144 levels in gametophytes and sporophytes ( $\log_2\text{TPM}$ ) were plotted for each group (Figure 1B). This  
145 analysis indicated that, overall, the most marked levels of generation-biased expression (high fold  
146 changes) were the result of down-regulation of genes in the generation where they were expressed  
147 more weakly, rather than strong up-regulation in the generation where they were expressed more  
148 strongly. However, for gametophyte-biased genes, the expression in sporophytes reached the lower  
149 threshold (about  $\log_2\text{TPM}<0$ ) much faster than the expression of sporophyte-biased genes in



150 gametophytes. In other words, when genes exhibited a moderate to high degree of gametophyte-  
151 biased expression, this was predominantly due to strong downregulation (silencing) of these genes  
152 in the sporophyte generation (Figure 1B).

153 Interestingly, in the Ectocarpales species more than 80% of the sporophyte-biased genes  
154 exhibited fold changes of between 2 and 6, whereas in the Laminariales species (which have a  
155 dominant sporophyte generation) a greater proportion of the sporophyte-biased genes exhibited  
156 very high fold changes between generations, with between 13% and 23% in *S. japonica* and *M.*  
157 *pyrifera*, respectively, exhibiting fold changes of more than 20 (Figure 1B; Table S2). Nevertheless,  
158 in all four species the majority of the generation-biased genes with very strong bias (FC>20) were  
159 gametophyte-biased (Figure 1B; Table S2), with as many as 50% of the gametophyte-biased genes  
160 in *S. lomentaria* belonging to this group (15% in *Ectocarpus* sp., 28% in *M. pyrifera* and 44% in *S.*  
161 *japonica*).

162 We also noted that, on average, sporophyte-biased genes were expressed at significantly  
163 higher levels than gametophyte-biased genes in all four species (Wilcoxon test,  $p < 2e-12$ ) (Figure  
164 1C). In general, the complexity of each life cycle generation, both in terms of number of cell types  
165 and size of the organism, tended to be correlated with the number of generation-biased genes  
166 (Table S3). For instance, *S. lomentaria*, which has a dominant gametophyte generation, possessed  
167 the highest proportion of gametophyte-biased genes. Conversely, *M. pyrifera* and *S. japonica*,  
168 whose sporophytes are much larger than the gametophytes (Figure S1, Table S3), exhibit the  
169 highest proportion of sporophyte-biased genes.

170 **High turnover of generation-biased gene sets in the brown algae**

171 Comparisons of orthogroups (OGs) containing generation-biased genes showed that they  
172 were poorly conserved between pairs of species (Figure 2A). Only 23% and 20% of the orthogroups  
173 (OGs) containing generation-biased genes were shared by the Ectocarpales and Laminariales  
174 species pairs respectively, and conservation between pairs of species from different orders was  
175 even lower (14% to 17%). Only 2% of the generation-biased OGs were conserved across all four of  
176 the study species (Figure 2A). Importantly, a large proportion of the generation-biased genes  
177 (between 36% and 63%) did not have orthologs in the genome of any of the other three study  
178 species nor in the genomes of four other distant Stramenopile species (Figure 2B; Table S4). We  
179 refer to these taxonomically-restricted genes hereinafter as "orphan" genes. The orphan genes  
180 were not included in the OGs analysis described above (Figure 2A) because most orphans are not  
181 members of an OG. The analysis of OGs therefore actually overestimated the degree to which  
182 generation-biased gene sets were conserved across species.

183 The sets of gametophyte-biased genes in *Ectocarpus* sp., *S. lomentaria* and *S. japonica* and  
184 the set of sporophyte-biased genes in *S. japonica* were significantly enriched in orphan genes

185 compared to the whole genome (Fisher test,  $p < 0.03$ ,  $p = 0.0008$ , respectively), suggesting that *de*  
186 *novo* evolution has played an important role in the emergence of the generation-biased gene sets.

A

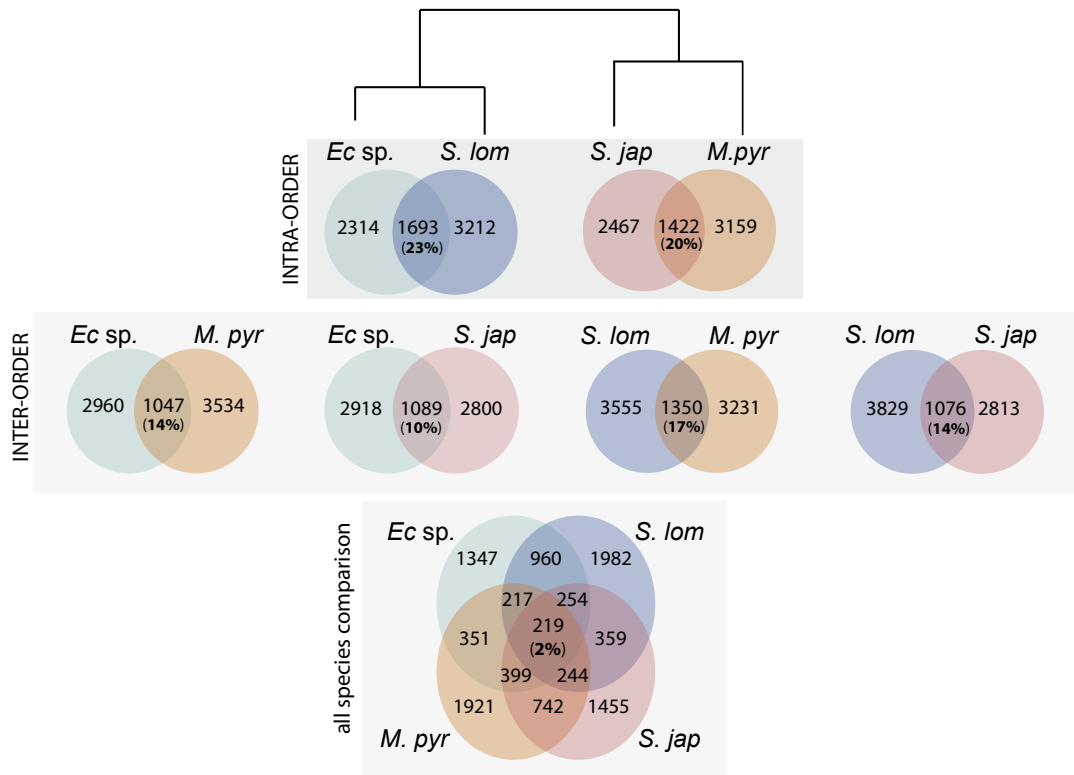

B

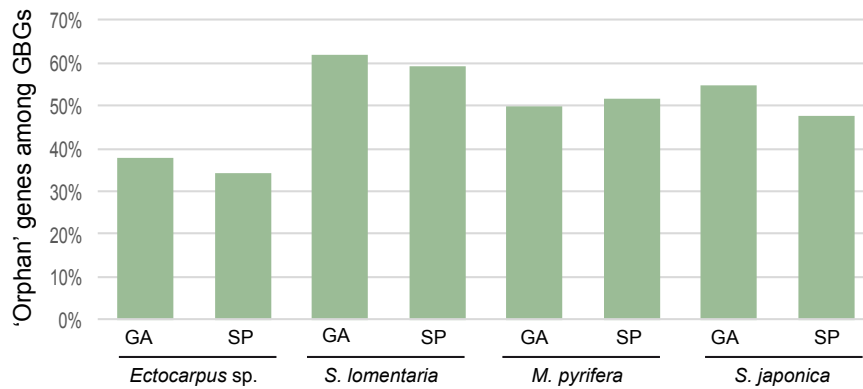

*Figure 2. OGs with generation-biased genes are poorly conserved across brown algal species and the generation-biased gene sets include many orphan genes. (A) Shared OGs with generation-biased genes across the four-studied species. Venn diagrams representing the number of shared versus species-specific generation-biased OGs. Comparisons were made at several evolutionary distances. (B) Proportion of orphan (taxonomically-restricted) genes within the generation-biased gene sets of each of the four-studied species. GBGs: generation-biased genes.*

## 188 Evolution of generation-biased expression of orthologous genes across brown algal species

189 To further analyse the evolutionary history of the generation-biased genes, we focused on  
190 genes for which there was a clear orthologous relationship across the four species. A large set of  
191 15,888 orthologous groups (OGs), identified using OrthoMCL, was screened to identify 6,035 single  
192 copy orthologous genes with either 1:1:1:1 or 1:1:1:0 occurrence across the four brown algal  
193 species (see methods for details). We will refer to this set of OGs as "all single orthologues" (ASOs).

194 The ASO dataset was used to assess the conservation of generation-biased gene expression  
195 across the four species. Of the 6,035 ASOs, 4,489 (74%) included genes that were generation-  
196 biased in at least one of the species. However, only 35 gametophyte-biased genes and three  
197 sporophyte-biased genes consistently exhibited patterns of generation-biased expression across all  
198 four species (Figure 3A). The number of genes with conserved generation-biased expression  
199 increased to 175 gametophyte-biased and 81 sporophyte-biased when we took into account  
200 orthologous genes with generation-bias in three species (with the ortholog missing or unbiased in  
201 the fourth species) (Figure 3A). Fifteen percent of the ASOs (904 of the 6,035) exhibited discordant  
202 generation-biased expression patterns, so that, for example, the orthologue of a gene that was  
203 sporophyte-biased in one species was gametophyte-biased in at least one of the other three  
204 species (Figure 3A).

205 We used hierarchical clustering of expression levels for all the members of the 1:1:1:1 ASO  
 206 dataset with at least one generation-biased member in one of the studied species to visualize global  
 207 transcription patterns within and among the four species. In this analysis, samples clustered  
 208 primarily by phylogenetic relatedness and not according to life cycle stage (Figure 3B), reflecting  
 209 the low level of conservation of generation-biased expression patterns of gene expression across  
 210 the lineages.

211 Taken together, these analyses indicated that the gametophyte-biased transcriptome tended  
 212 to be more conserved than the sporophyte-biased transcriptome, but overall, generation-biased  
 213 expression of the ASO dataset was extremely poorly conserved across the four brown algal species.

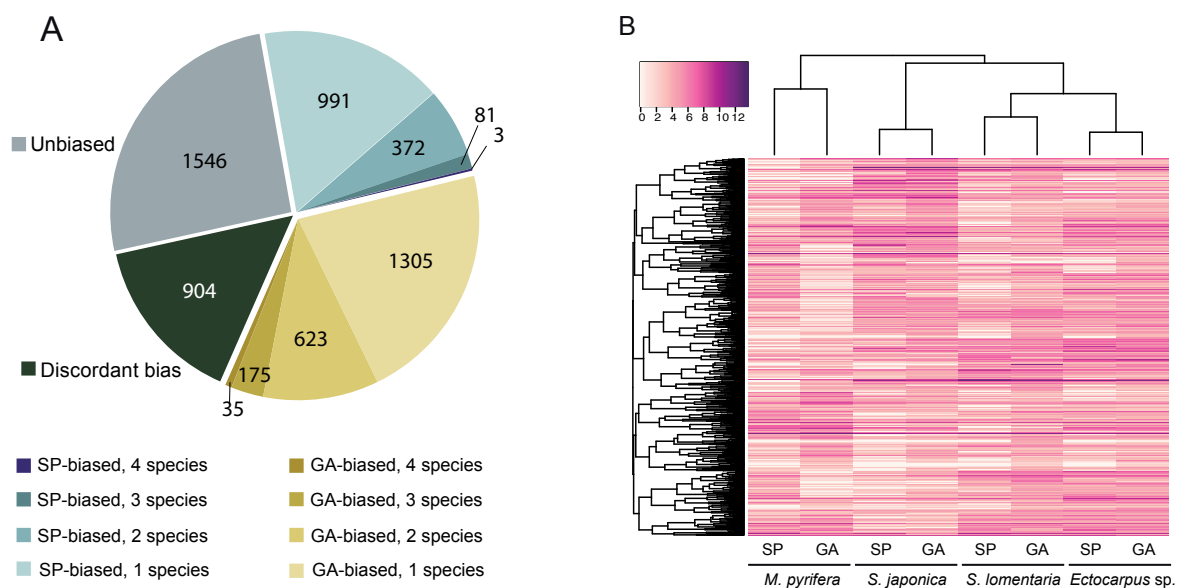

214  
 Figure 3. Conservation of generation-biased gene expression across species. **(A)** Numbers of ASOs showing unbiased, discordant bias or different degrees of shared bias between the four studied species. GA: gametophyte; SP: sporophyte **(B)** Hierarchical clustering and heatmap of gene expression for all the members of the 1:1:1:1 ortholog dataset with at least one generation-biased member in one of the studied species (Heatmap3 package, R). The dendrogram was constructed using hierarchical clustering with 1000 bootstraps (pvclust package, R).

## 215           **Generation-biased gene expression within the Ectocarpales and Laminariales**

216           To analyse divergences of generation-biased expression patterns within orders, we used the  
217 OrthoMCL analysis to identify single copy (1:1) orthologues shared either by the two Ectocarpales  
218 (6,438 OGs) or by the two Laminariales (5,061 OGs) species. These sets of 1:1 OGs were termed  
219 "pairwise single orthologues" (PSOs) (Table S5).

220           Between 22-34% (Ectocarpales) and 24-33% (Laminariales) of the generation-biased genes  
221 were PSOs, whereas the remaining generation-biased genes had no ortholog in the other species  
222 from the same order (Figure 4A). Between 11-22% (for both Ectocarpales and Laminariales) of the  
223 generation-biased genes gained either sporophyte- or gametophyte-biased expression in one of  
224 the species (Figure 4A), whereas discordant generation-biased expression was observed for 1.5-5%  
225 (Ectocarpales) and 2-5% (Laminariales) of the generation-biased genes (Figure 4A).

226           Overall, species-specific gametophyte-biased genes presented greater bias, measured as fold  
227 change (Figure 4B). This was particularly pronounced in *S. lomentaria*, where about half of the  
228 species-specific genes with gametophyte-bias had expression levels at least 50 times higher  
229 ( $\log_2FC > 5.7$ ) than in the sporophyte. In Laminariales, conversely, it was the species-specific genes  
230 with sporophyte-biased expression that presented overall higher fold changes (Figure 4B). In other  
231 words, newly emerged, species-specific genes showed a strong magnitude of bias in gametophytes  
232 of Ectocarpales and sporophytes of Laminariales.

233           A correlation was observed between the level of bias and the conservation of generation-  
234 biased genes within each lineage (Ectocarpales and Laminariales), i.e. the mean fold change of  
235 genes that were conservatively generation-biased (both gametophyte-biased or both sporophyte-

236 biased) across the species pairs was significantly higher than that of genes were generation-biased  
237 in one of the species but unbiased in the other (Figure 4C; Wilcoxon test,  $p < 1e-05$ ). Taken together,  
238 these analyses suggested that the rapid evolution of generation-biased gene sets involves not only  
239 the emergence of new generation-biased genes but also the emergence, in species-specific  
240 fashion, of novel generation-biased expression patterns associated with existing orthologous  
241 genes.



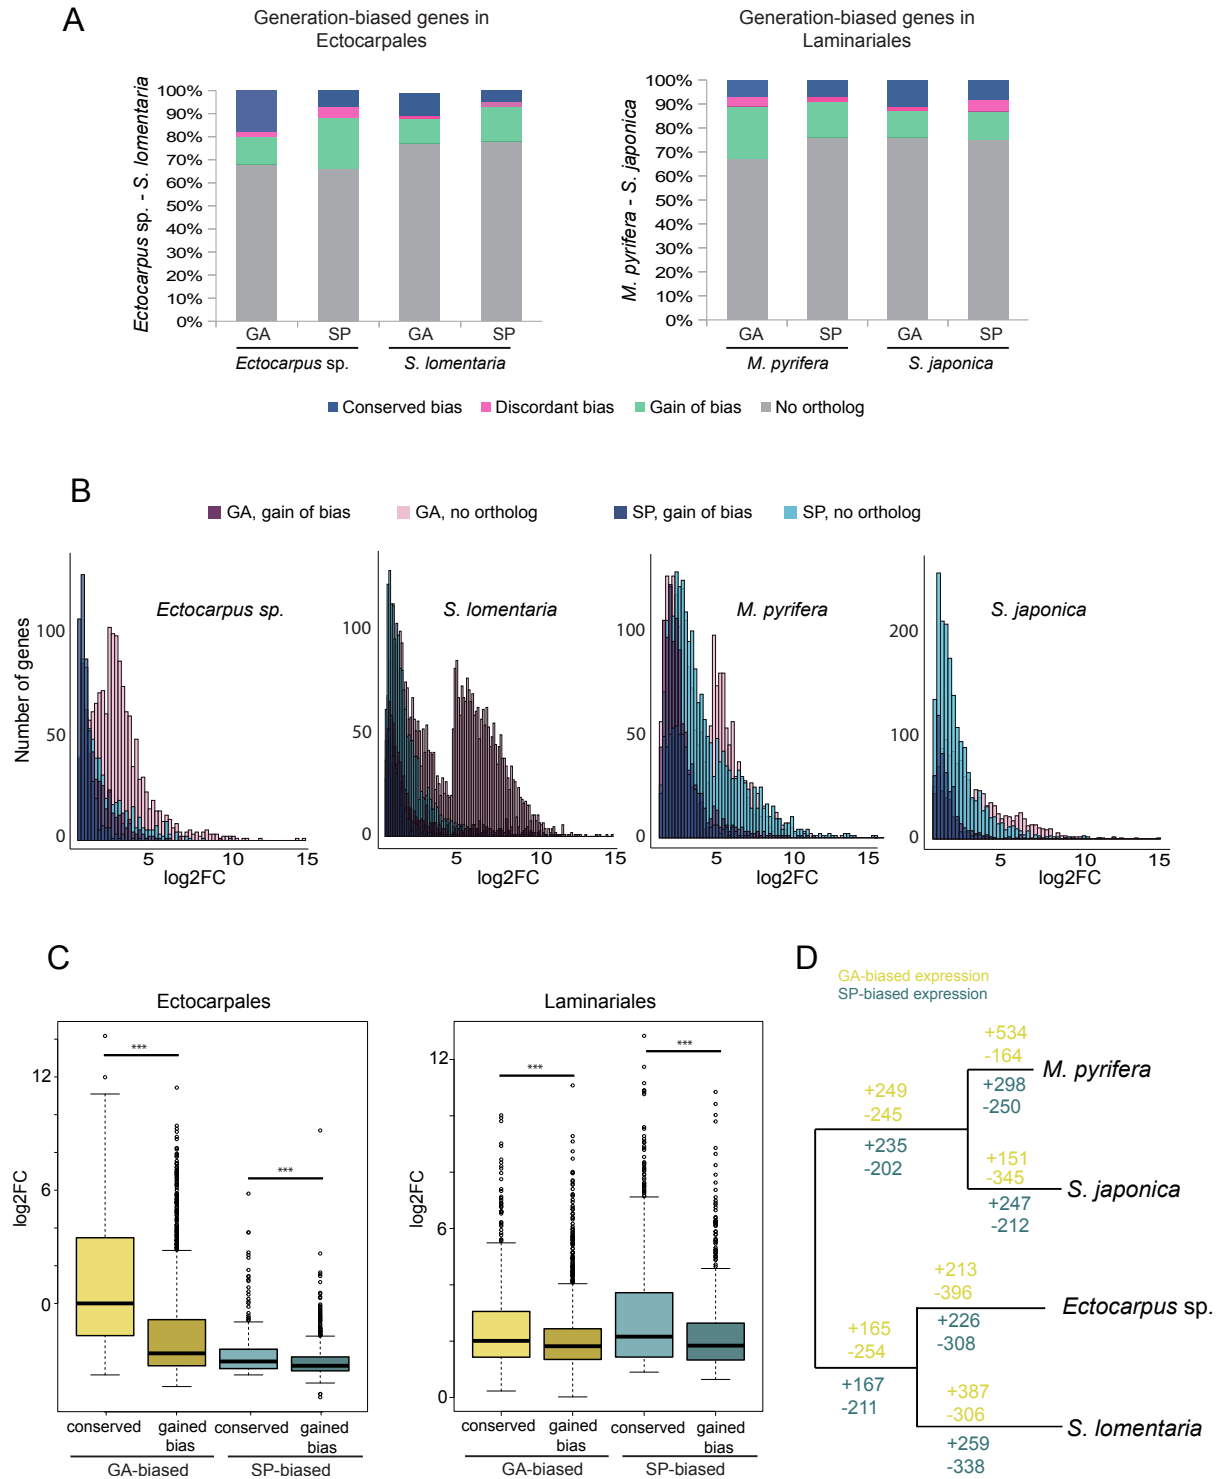

Figure 4. Conservation of generation-bias across the Ectocarpales (*Ectocarpus* sp. and *S. lomentaria*) and Laminariales (*S. japonica* and *M. pyrifera*). (A) Proportion of the PSOs among generation-biased genes. In grey, genes which had no ortholog in the other species of the same order, colour indicates PSOs. For the PSOs, genes with 'Conserved bias' (dark blue) exhibited the same bias in the two species. Genes with 'Discordant bias' (pink) were gametophyte-biased in one species and sporophyte-biased in the other species. 'Gained bias' genes (green) were generation-biased in one species but not in the other species. (B) Distribution of magnitude of generation-bias ( $\log_2$  fold changes) for PSOs that gained bias (ortholog is unbiased in the other species) and species-specific genes with biased expression (no ortholog in the other species). Orthology was established per lineage in pairwise comparisons between *Ectocarpus* sp.-*S. lomentaria* and *S. japonica*-*M. pyrifera*. (C) Overall level of generation-biased expression ( $\log_2FC$ ) for PSOs that are conserved versus PSOs that gained bias in Ectocarpales and Laminariales. (D) Representations of gene gain/loss events across the branches of the Ectocarpales and Laminariales phylogeny. Expected numbers of events are based on multiple stochastic mappings (see methods for detail).

### 243 Evolutionary history of generation-biased gene sets

244 We used a phylogenetic stochastic mapping approach to investigate the evolution of  
245 generation-biased gene expression. Phylogenetic stochastic mapping allows reconstruction of the  
246 history of trait changes (in our case, generation-bias) based on the estimation of the probabilities  
247 and expectations of gain and loss events for each branch of an underlying phylogenetic tree [23].  
248 Rates of gain and loss were equal for both gametophyte- and sporophyte-bias, as determined by a  
249 likelihood ratio test between the ER and ARD models (all p-values >0.05). The stochastic mapping  
250 results highlighted widespread and rapid turnover of generation-biased genes during evolution of  
251 the Laminariales and Ectocarpales (Figure 4D). Specifically, more events of gain of bias were  
252 observed for gametophyte-biased genes, and, conversely, sporophyte-biased genes presented  
253 more events of loss of bias. Overall, gametophyte-biased genes presented a more rapid turnover  
254 with a higher total number of events compared with sporophyte-biased (3409 versus 2953).

### 255 Duplicated generation-biased genes

256 Gene duplication and generation-specific co-option of paralogs may be a mechanism to  
257 resolve potential generation antagonism due to evolutionary divergence between the two

258 generations. Analysis of in-paralogs identified by OrthoMCL indicated that the generation-biased  
259 gene sets of *Ectocarpus* sp., *S. lomentaria* and *M. pyrifer* were not enriched in members of  
260 duplicated gene pairs compared with the rest of the genes in each genome (Fisher test,  $p=1$ ).  
261 However, duplicated genes constituted 32 and 36% of gametophyte and sporophyte-biased genes  
262 in *S. japonica* (Table S4, Figure 5), which was significantly more than expected by chance (Fisher  
263 test,  $p<2e-16$  for both comparisons).

264         Discordant bias was observed for 10-44% of generation-biased in-paralog pairs. *S. japonica*  
265 had significantly more generation-biased in-paralog pairs that showed discordant bias than the  
266 other three species (Chisqr test,  $p<0.007$ ). The set of in-paralogs with discordant bias was  
267 completely different for each species, indicating that duplication of genes followed by acquisition

268 of two, opposite generation-biased expression patterns by the resulting in-paralogs occurred  
 269 independently in each of the four lineages.

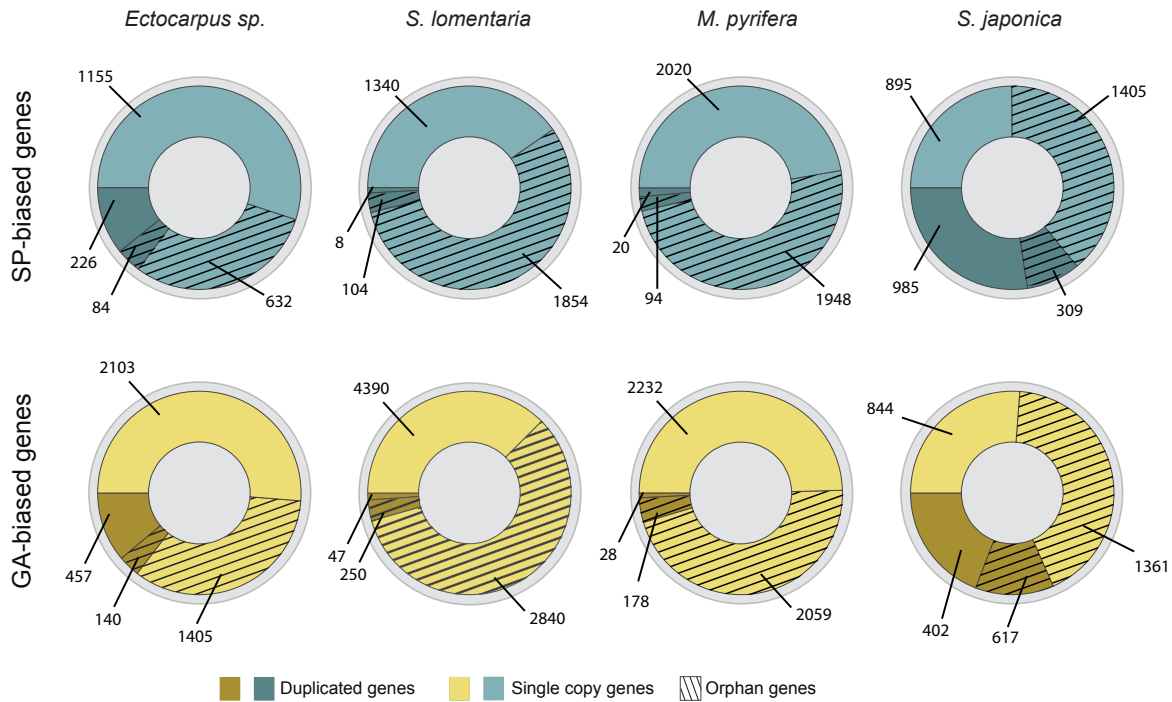

270

Figure 5. Proportion of single copy versus duplicated genes and amount of orphan (taxonomically restricted) genes among gametophyte and sporophyte-biased genes in each of the brown algal species.

### 271 Predicted functions of generation-biased genes

272 An analysis of gene ontology (GO) terms associated with the generation-biased genes was  
 273 carried out using Blast2GO [24] to search for enrichment in particular functional groups. First,  
 274 Blast2GO analysis was carried out for each species, in order to relate gene function to the  
 275 phenotypic generation dimorphisms specific to each species.

276 The GO terms associated with *M. pyrifera* and *S. japonica* sporophyte-biased genes were  
 277 enriched in biological processes related to reproduction, carbohydrate metabolism, protein

278 modification, growth and development, signalling, cell communication, response to external  
279 stimulus and homeostasis (Fisher exact test,  $p < 0.05$ , Table S6). Interestingly, a similar set of GO  
280 terms was enriched for the gametophyte-biased genes of *S. lomentaria*, in addition to categories  
281 related to sexual reproduction and cilium motility (Figure S2, Table S6). This result suggest that  
282 similar genetic processes are at work in the morphologically complex, long-lived, dominant  
283 generations of these three species, despite the large morphological differences between  
284 gametophytes of *S. lomentaria* and sporophytes of Laminariales and the limited number of shared  
285 generation-biased genes.

286 Analysis of the gametophyte-biased genes from all the studied species identified six GO terms  
287 related to biological processes that were consistently significantly enriched in all species (Fisher  
288 exact test  $p < 0.05$ ). These terms included microtubule and flagellar movement-related categories  
289 and corresponded to between 10% and 50% of gametophyte-biased genes with assigned ontology  
290 (Table S7). Three GO terms were consistently enriched for the sporophyte-biased genes of all the  
291 studied species. These terms, which were related to carbohydrate metabolism and small GTPase  
292 signalling processes, corresponded to between 10% and 20% of the sporophyte-biased genes in  
293 each species.

#### 294 **Structural characteristics of the generation-biased genes**

295 Several structural characteristics (GC and GC3 content, coding region size and intron number)  
296 were compared between sporophyte-biased, gametophyte-biased and unbiased genes (Figure S3;  
297 Table S8). Gametophyte-biased genes tended to have longer coding regions, to possess more  
298 introns and to have a lower GC3 content than unbiased genes in all four species (Wilcoxon test,  $p$ -

299 value $<6e-04$ ). In contrast, sporophyte-biased genes did not present a consistent trend in relation  
300 to the unbiased genes in any of the species studied. Excluding orphan genes from the analysis did  
301 not significantly change the results indicating that the structural characteristics of gametophyte-  
302 biased genes were not due to the fact that these genes are evolutionary younger (Figure S4).

### 303 **Evolutionary features of the generation-biased genes**

304 The evolutionary dynamics of generation-biased genes was investigated by calculating ratios  
305 of pairwise synonymous to nonsynonymous substitution rates and comparing these data with gene  
306 expression divergence (see Methods). This analysis, which was applied to all the PSOs that could  
307 be examined for each order (Ectocarpales and Laminariales), indicated that gametophyte-biased  
308 genes evolve faster (i. e., had higher dN/dS ratios) than unbiased or sporophyte-biased genes in  
309 both Ectocarpales species (Figure 6A; Wilcoxon test,  $p<1e-11$ ) and in *M. pyrifera* (Wilcoxon test  
310  $p<0.005$ ). The kelp *S. japonica* was the only exception, no significant difference was observed  
311 between the rates of evolution of gametophyte-biased and unbiased genes for this species (Figure  
312 6A).

313 Sex-biased genes have been shown to exhibit accelerated rates of evolution in *Ectocarpus* sp.  
314 [25] and many of the gametophyte-biased genes also exhibit a sex-biased pattern of expression  
315 (809 genes or about 20%) because this is the sexual generation of the life cycle. However, when  
316 these sex-biased genes were removed from the dN/dS analysis, the gametophyte-biased genes still  
317 showed faster evolutionary rates than unbiased or sporophyte-biased genes (Figure S5A; Wilcoxon  
318 test  $p$ -value= $6.3e-13$  for the gametophyte versus unbiased comparison,  $p$ -value= $2e-09$  for the  
319 gametophyte versus sporophyte-biased comparison) indicating that the faster evolutionary rates

320 of gametophyte-biased genes were not solely due to the presence of sex-biased genes. Similar  
321 results were obtained when we subdivided the generation-biased genes into conserved bias and  
322 species-specific bias (i.e. genes that showed generation bias in one species but were unbiased in  
323 the other) (Figure S5B, S5C). This latter analysis suggested that the faster evolutionary rates of  
324 gametophyte-biased genes were not correlated with the degree of conservation of expression  
325 across the lineages.

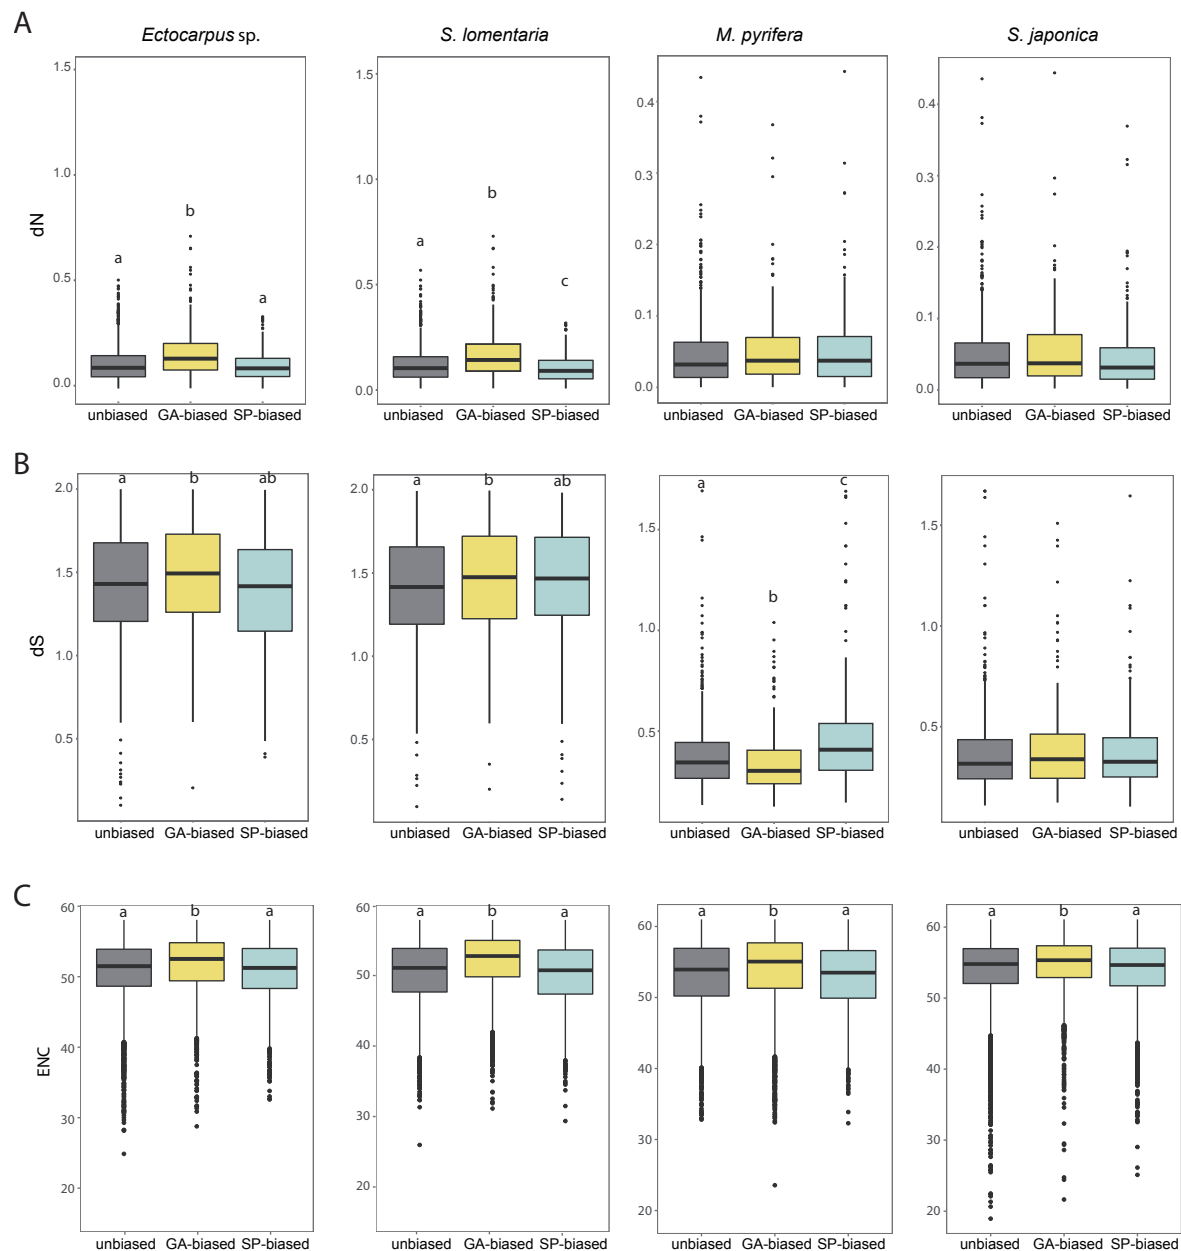

326

Figure 6. Evolution of generation-biased genes. (A) Evolutionary rates measured as dN/dS between species pairs (*Ectocarpus sp.*/*S. lomentaria*, *M. pyrifera*/*S. latissima*) for unbiased, gametophyte-biased and sporophyte-biased genes in the four brown algal species. (B) Gene expression divergence measured as Euclidean distances for unbiased, gametophyte- and sporophyte-biased genes in each of the four brown algal species. Different letters above the plots indicate significant differences (Wilcoxon test;  $P < 0.05$ ).

327 The higher evolutionary rates of gametophyte-biased genes were due to the accumulation of

328 both synonymous and non-synonymous changes (Figure S6A, S6B). There was no correlation



329 between dN/dS and fold change of generation-biased gene expression between generations  
330 (Spearman's  $\rho = -0.037$ ). Codon usage bias (CUB), measured as the effective number of codons  
331 (ENC), indicated that gametophyte-biased genes had significantly lower codon usage bias (i.e.  
332 higher ENC) than sporophyte-biased and unbiased genes in both Ectocarpales and Laminariales  
333 (pairwise Wilcoxon test  $p < 3.0e-11$ ) (Figure S6C). We found no significant difference in CUB between  
334 sporophyte-biased and unbiased genes.

335 Overall, order-specific genes (i.e., 'young' genes) exhibited higher evolutionary rates (dN/dS)  
336 than genes conserved across the four species ('old' genes) for both the Ectocarpales (Wilcoxon test,  
337  $p\text{-value} = 2.8e-13$ ) and Laminariales (Wilcoxon test,  $p\text{-value} = 6.5e-06$ ), suggesting that younger genes  
338 are evolving more rapidly (Figure S7).

339 To assess whether increased protein divergence rates were due to increased positive  
340 selection or relaxed purifying selection, we performed a maximum likelihood analysis using codeml  
341 in PAML4. In addition to the four study species, we searched for orthologs of the ASOs in published  
342 transcriptome data for three additional *Ectocarpus* species (*E. fasciculatus*, an unnamed *Ectocarpus*  
343 species from New Zealand and *Ectocarpus siliculosus*) and the recently published genome of *C.*  
344 *okamuranus* [26]. The 522 conserved orthologs identified by this analysis included 393 orthologs  
345 that exhibited generation bias in at least one of the studied species. For 42 of these comparisons  
346 both pairs of models (M1a-M2a, M7-M8) suggested positive selection and a total of 111 genes  
347 were predicted to be evolving under positive selection as indicated by the model M7-M8 alone  
348 (Table S9). Among the 111 genes identified by the M7-M8 model, 83 exhibited generation-bias in  
349 at least one species. Taken together, our analysis is consistent with the idea that a subset of the  
350 generation-biased genes exhibit signatures of positive selection, although the set of generation-

351 biased genes was not significantly enriched in genes that were predicted to be under positive  
352 selection (Fisher's exact test,  $P=0.8045$ ).

353 When patterns of gene expression were considered, measured as Euclidian distances for  
354 PSOs within each order, sporophyte-biased genes showed overall significantly larger divergence  
355 that unbiased or gametophyte-biased genes (Figure 6B; Wilcoxon test  $p<3e-7$ ). Furthermore,  
356 gametophyte-biased genes exhibited the most conserved expression patterns within each order,  
357 even in comparison to unbiased genes.

358 Taken together, our data suggests that gametophyte- and sporophyte-biased genes have  
359 distinct patterns of evolution: gametophyte-biased genes tend to exhibit rapid evolution of their  
360 coding sequence whereas sporophyte-biased genes tend to exhibit changes to their patterns of  
361 expression.

## 362 DISCUSSION

363 Here, we have used four phylogenetically-diverse brown algal species with different levels of  
364 generation dimorphism and complexity to investigate genome-wide generation-biased gene  
365 expression patterns and to assess the potential role of generation-specific selection in shaping  
366 these patterns of gene expression.

### 367 **Differential gene expression underlies phenotypic dimorphism between life cycle generations**

368 Between 35% and 46% of the genome of the brown algae species studied here was  
369 differentially regulated during the gametophyte and sporophyte generations of the life cycle. This  
370 is substantially more than in the moss *Funaria hygrometrica*, where only 4% of the genome is

371 differentially expressed [27], and even exceeds the situation in *Arabidopsis*, where about 30% of  
372 the genome is generation-biased [28]. Comparative analysis between these two land plants showed  
373 that the relative proportion of generation-biased genes assigned to the two life cycle generations  
374 was lower in the moss than in *Arabidopsis* [27], consistent with the lower level of phenotypic  
375 dimorphism between generations in the former. Likewise, we found that for the brown algae  
376 studied here the relative numbers of generation-biased genes during each generation was broadly  
377 correlated with size differences between the two generations. Despite this tendency, however, the  
378 absolute number of gametophyte-biased genes was consistently greater than the number of  
379 sporophyte-biased genes across all four studied species, even in kelps where the gametophyte is  
380 much less complex, morphologically, than the sporophyte. This tendency is difficult to explain but  
381 we note that a previous analysis using *Ectocarpus* sp. also indicated that the gametophyte  
382 developmental program deployed more genes than the sporophyte program [4]. Based on this  
383 difference it was proposed that the switch to the sporophyte program involves predominantly gene  
384 repression. Again, this hypothesis is consistent with our analysis indicating that gametophyte-  
385 biased gene expression tends to be the result of downregulation during the sporophyte generation.

### 386 **Generation-conflict and generation-biased gene expression**

387 In many brown algal species, free-living gametophytes and sporophytes display extensive  
388 morphological and physiological dimorphisms (reviewed in [1,29,30]) and this phenotypic diversity  
389 reflects in many cases different ecological niche preferences for gametophytes and sporophytes  
390 (e.g.[14,31]). Gametophyte and sporophyte development and function are controlled by a common  
391 genome, with a large number of genes carrying out functions during both generations. When there  
392 are marked morphological and physiological differences between the two generations, as is the

393 case for most of the species studied here, this can lead to conflict due to genes being submitted to  
394 different selection pressures during the different generations of the life cycle. Generation-biased  
395 gene expression is one mechanism to reduce inter-generational conflict, allowing gene products to  
396 be targeted specifically to one generation (although this does not necessarily mean that every  
397 generation-biased gene arose due to generation antagonism). Gene duplication, followed by  
398 acquisition of generation-bias through neo-functionalization, can play an important role in the  
399 resolution of generation conflict and we found some evidence for this, at least for one of the kelp  
400 species. Note that gene duplication followed by neo-functionalisation has also been proposed as  
401 one of the mechanisms that allow resolution of sexual antagonism (reviewed in [17]).

#### 402 **Generation-biased genes turnover rapidly during the evolution of the brown algae**

403 Perhaps the most striking result of our analysis is the remarkably limited number of  
404 generation-biased genes that were shared by all the four of the studied species, indicating a rapid  
405 turnover of life cycle-biased genes in brown algae. This turnover appears to be due to a  
406 combination of two processes: emergence of new genes with generation-bias and gain/loss of bias  
407 in existing, orthologous genes. The former mechanism appears to have been of paramount  
408 importance as between 36% and 63% of generation-biased genes were orphans, depending on the  
409 species. Phylogenetic stochastic mapping results were consistent with rapid loss and gain of bias in  
410 orthologous genes, and highlighted a particularly high rate of turnover for gametophyte-biased  
411 genes.

412 The ancestor of brown algae is thought to have alternated between multicellular, isomorphic  
413 gametophyte and sporophyte generations without a clearly dominant generation [22]. From this

414 morphologically simple ancestor, there would have been a tendency, in most brown algal lineages,  
415 to evolve towards increased complexity of either the gametophyte or the sporophyte generation  
416 [22]. Our data indicate that this increase in size and developmental complexity was accompanied  
417 by an overall increase in the proportion of the transcriptome that become gametophyte- or  
418 sporophyte-biased, depending on the lineage.

419         Recent analysis of *Ectocarpus* sp. developmental mutants have indicated that the evolution  
420 of the sporophyte and gametophyte genetic programs involved both co-option of genetic programs  
421 from one generation to the other and generation-specific innovations [34,35]. We observed that a  
422 subset of the expressed genes in the four brown algal species exhibited switching of bias between  
423 life cycle generations in the different lineages, in line with the idea that the evolution of the  
424 generation-specific developmental programs in the brown algae has, to some extent, involved  
425 sharing of genes between generations. But importantly, our evidence indicates that the evolution  
426 of brown algal gametophyte and sporophyte developmental programs has been predominantly  
427 driven by the emergence of lineage-specific, orphan genes, suggesting a more important role for  
428 generation-specific innovations during the evolution of the sporophyte and gametophyte genetic  
429 programs.

430         The evolutionary origins of the sporophyte and gametophyte developmental programs in  
431 land plants have been intensively studied, particularly with regard to the question of whether each  
432 generation has independently evolved its own developmental pathways or, alternatively, whether  
433 there has been recruitment of developmental programs from one generation to the other during  
434 evolution [36–38]. It is currently thought that the developmental networks that implement land  
435 plant sporophyte programs were mainly recruited from the gametophyte generation, which was

436 initially the dominant generation [27,36,39] although there is also evidence that there have been  
437 sporophyte-specific innovations [27,40]. We suggest however, based on the observations  
438 presented here for the brown algae, that it may be an oversimplification to think in terms of one  
439 generation gradually recruiting programs from the other generation, and that a more extensive  
440 sampling of generation-biased gene sets in land plants may reveal a more dynamic situation  
441 involving important amounts of both lineage-specific gene evolution and lineage-specific switching  
442 of generation-biased expression patterns.

443         Interestingly, despite the marked differences between the generation-biased gene sets of the  
444 four studied brown algae, the enriched GO terms associated with genes expressed during the more  
445 morphologically complex, long-lived, dominant generation tended to be similar. The predicted  
446 functions of both the sporophyte-biased genes of kelps and the gametophyte-biased genes of *S.*  
447 *lomentaria* were enriched in GO terms associated with polysaccharide and cell wall biosynthesis,  
448 developmental processes, cell signalling and cell communication. These conserved, enriched GO  
449 terms could reflect developmental and morphological processes common to dominant life cycle  
450 generations, such as extended multicellular growth.

#### 451         **Rapid evolution of the coding regions of gametophyte-biased genes**

452         On average, gametophyte-biased genes were found to be evolving significantly more rapidly  
453 (higher dN/dS) than sporophyte-biased and unbiased genes in all the species studied except *S.*  
454 *japonica*. This was surprising because purifying selection is expected to be more efficient for genes  
455 expressed during the haploid phase of the life cycle due to the absence of masking of recessive and  
456 partially recessive mutations [42,43]. However, accelerated evolution of gametophyte-biased genes

457 has also been previously reported in land plant systems [28,41] and a number of hypothesis have  
458 been put forward to explain this phenomenon. It has been suggested, for example, that  
459 gametophyte-biased genes are under relaxed constrain because of lower expression breadth and  
460 low level of tissue complexity [27,41,44–46]. This hypothesis is unlikely to explain our observations  
461 because in *S. lomentaria* the gametophyte generation is the dominant phase of the life cycle and is  
462 larger and more complex than the sporophyte. It has also been proposed that strong selection on  
463 reproductive traits during gametogenesis (i.e., during the gametophyte-generation) may explain  
464 the faster rates of evolution of gametophyte-biased genes in plants [41]. However, when sex-biased  
465 genes were excluded from the *Ectocarpus* sp. gametophyte-biased gene dataset, the remaining  
466 genes still exhibited a significantly higher rate of evolution than that of unbiased or sporophyte-  
467 biased rates. Finally, land plant gametophyte-biased gene sets are enriched in young genes [34]  
468 and this may affect evolution rate as young genes are known to evolve more rapidly. However, rapid  
469 evolution of young genes is unlikely to explain the faster evolutionary rates of brown algal  
470 gametophyte-biased genes because the gametophyte- and sporophyte-biased gene sets contained  
471 similar numbers of young (faster evolving) genes.

472 We did note, however, that gametophyte-biased genes have overall lower levels of expression  
473 than sporophyte-biased genes, and expression levels have been negatively correlated with  
474 evolutionary rates [47–49]. Moreover, since that gametophyte-biased genes turn over more rapidly  
475 than sporophyte-biased genes, one interesting possibility is that gametophyte-biased genes may  
476 be less associated with complex gene interaction networks, and therefore be more dispensable and  
477 thus under less constraint [50–52]. More information about gene interaction networks will be  
478 needed for the brown algae in order to test this hypothesis.

479 **Sporophyte-biased and gametophyte-biased genes exhibit different patterns of evolution.**

480 In contrast to the gametophyte-biased genes, sporophyte-biased genes did not exhibit overall  
481 accelerated rates of evolution of their coding sequences but they did exhibit significantly higher  
482 levels of diversification of expression patterns (measured as Euclidean distance), compared to both  
483 unbiased and gametophyte-biased genes. Therefore, whilst the gametophyte-biased genes  
484 exhibited accelerated evolution of their coding regions, the sporophyte-biased genes appeared to  
485 have experienced accelerated evolution of their regulatory sequences. Decoupling of protein  
486 sequence evolution and expression pattern evolution has been observed in other eukaryotes (e.g.  
487 [50,51], but see [52,53]) but it is not clear why the mechanisms of evolution should differ between  
488 gametophyte-biased and sporophyte-biased genes in these brown algal species. It has been  
489 suggested that mutations that change protein sequences and mutations affecting gene regulation  
490 play different roles during evolution, with genes involved in physiological traits tending to exhibit  
491 the former and genes involved in morphological traits evolve primarily in terms of gene expression  
492 [58,61]. An in-depth functional analysis of brown algae genes using experimental approaches will  
493 be crucial to understand if the different evolutionary modes of gametophyte- and sporophyte-  
494 biased genes are associated with different functions of the gene networks underlying each  
495 generation.

496 **CONCLUSIONS**

497 This study afforded the first comparative analysis of generation-biased gene expression  
498 across several species with complex life cycles to understand the role of generation-specific  
499 selection in shaping patterns of gene expression and divergence. Our analyses revealed that an



500 extensive proportion of the genome exhibits generation-biased expression in the brown algae and  
501 the relative proportion of genes that are generation-biased was correlated with the degree of  
502 phenotypic dimorphism between generations. Life cycle-biased genes turn over very rapidly during  
503 evolution due to a combination of two processes: the gain/loss of generation-biased expression by  
504 orthologous loci and the emergence, *de novo*, of genes with generation-biased expression. Our  
505 results are consistent with the idea that the evolution of the genetic program associated with each  
506 generation appears to have involved the recruitment of genes across generations but the  
507 exceptionally high number of generation-biased orphan genes emphasizes an important role for  
508 generation-specific developmental innovations in each lineage. Finally, our analysis has revealed that  
509 gametophyte and sporophyte exhibit overall distinct evolutionary modes, with gametophyte-biased  
510 genes evolving rapidly predominantly at the level of their sequence and sporophyte-biased genes  
511 diverging mostly at the level of their patterns of expression.

## 512 **METHODS**

### 513 **Biological material and generation of genomic and transcriptomic sequence data**

514 The algal strains used, sequencing statistics and accession numbers are listed in Table S10.  
515 We used published RNA-seq datasets for gametophytes and sporophytes of the model brown alga  
516 *Ectocarpus* sp. [25,62], *S. japonica* (Teng et al., 2017), *M. pyrifera* (Lipinska et al., 2017) and for  
517 gametophytes of *S. lomentaria* (Lipinska et al., 2015). *S. lomentaria* sporophytes (strain Zy2) were  
518 derived from a controlled laboratory cross between the Asari6 female gametophyte and the Asari9  
519 male gametophyte. Both gametophytes were field collected. Sporophyte clones were grown in  
520 20°C 14h:10h light:dark conditions, in half-strength Provasoli enriched seawater [63] which allowed

521 them to be maintained as immature thalli (absence of meiotic structures). For the gametophyte  
522 and sporophyte of *Ectocarpus* sp., gametophyte and sporophyte of *S. lomentaria* and gametophyte  
523 of both kelps we used whole thallus for RNA extractions. Total RNA was extracted using the Qiagen  
524 Mini kit (<http://www.qiagen.com>) as previously described (Coelho, et al. 2012). RNA was  
525 sequenced with Illumina HiSeq 2000 paired-end technology with a read length of 125 bp (Fasteris,  
526 Switzerland) and is available under the accession number detailed in Table S10.

527 For the sporophytes of kelps, we used RNA-seq data produced from replicate samples of  
528 blades tissue of adult individuals from natural populations (SRA references provided in Table S10).

529 Sets of reference genes for each species were derived from the published genomes of  
530 *Ectocarpus* sp. and *S. japonica* [64,65] or from draft genome assemblies for *S. lomentaria* and *M.*  
531 *pyrifera* [62] with gene prediction based on mapping of RNA-seq data using Stringtie [66]. Quality  
532 filtering of the raw reads was performed with FastQC  
533 (<http://www.bioinformatics.babraham.ac.uk/projects/fastqc>), and adapter sequences were  
534 trimmed using Trimmomatic (leading and trailing bases with quality below 3 and the first 12 bases  
535 were removed, minimum read length 50 bp [67]). *Ectocarpus* sp. and *S. japonica* reads were aligned  
536 to the reference genomes [65,68] using Tophat2 [59–61]. Gene models for *S. lomentaria* and *M.*  
537 *pyrifera* were predicted using Transdecoder (<http://transdecoder.sf.net>) based on mapping of the  
538 RNA-seq data (Tophat2) to the draft genome sequences generated previously for these two species  
539 [62]. Gene expression levels were represented as TPMs. Genes with expression values below the  
540 5<sup>th</sup> percentile of all TPM values calculated per species were considered not to be expressed and  
541 were removed from the analysis.

542 **Identification of generation-biased and generation-limited genes**

543 The filtering steps described above yielded a set of expressed genes in the transcriptome that  
544 were then classified based on their generation-expression patterns. Genes were considered to be  
545 gametophyte-biased or sporophyte-biased if they exhibited at least a 2-fold difference in expression  
546 between generations with a false discovery rate (FDR) of  $< 0.05$ . Generation-biased genes were  
547 defined as generation-limited when the TPM was below the 5<sup>th</sup> percentile for one of the  
548 generations.

### 549 **Gene orthology**

550 OrthoMCL (Fischer, 2011) was used to assess orthologous relationships between the genes  
551 of the four-studied species (blastp, e-value  $< 1e-5$ ). OrthoMCL identified a total of 15,888  
552 orthogroups (OGs), of which 3,290 contained only one gene per species and therefore represented  
553 the set of 1:1:1:1 OGs. An additional 2,745 OGs had only one member in three of the studied  
554 species but no ortholog (i.e. the gene was missing) in the fourth species (1:1:1:0 OGs). We  
555 considered that these 1:1:1:0 OGs, which most likely represent single copy ancestral genes that  
556 were lost in one of the species, also provided useful information about conservation of generation-  
557 biased gene expression because they consisted of members from two different orders  
558 (Ectocarpales and Laminariales). We therefore combined the two sets of OGs (1:1:1:1 and 1:1:1:0)  
559 to create the "all single orthologues" (ASO) dataset, which was composed of a total of 6,035 OGs.  
560 The ASO dataset was employed to assess conservation of generation-biased gene expression across  
561 the four-studied species.

562 For pairwise comparisons within orders, we selected OGs that contained only one member  
563 in each of the two species (6,438 OGs for the Ectocarpales and 5,061 OGs for the Laminariales).  
564 We refer to the OGs in these datasets as "pairwise single orthologues" (PSOs).

565 Orphan (or *de novo*) genes (i. e., taxonomically restricted genes) were defined as genes  
566 present in the genome of only one species and having no BLASTp match (10<sup>-4</sup>E value cutoff) with  
567 a range of other stramenopile genome-wide proteomes from public databases (indicating that they  
568 are likely to have evolved since the split from the most recent common ancestor): the brown alga  
569 *Cladosiphon okamuranus* [26] the eustigmatophyte *Nannochloropsis gaditana* [72], the  
570 pelagophyte *Aureococcus anophagefferens* [64] and the diatom *Thalassiosira pseudonana* [74].  
571 Duplicated genes were identified in each species using the in-paralog list generated by OrthoMCL.

## 572 Prediction of gene function

573 InterProScan [75] and BLAST2GO [24] were used to assign protein function annotations to  
574 genes in all four-studied species. Fisher's exact test with a p-value cutoff of 0.05 was used to detect  
575 enrichment of specific GO-terms in various groups of generation-biased genes.

576 The visualization of gene ontology data used for Figure S2 was generated using Revigo [76].

## 577 Evolutionary analysis

578 To estimate the evolutionary rates (non-synonymous to synonymous substitutions, dN/dS)  
579 for generation-biased and unbiased genes, pairwise analyses were carried on the PSOs for each  
580 order (Ectocarpales and Laminariales). Orthologous protein sequences were aligned with Tcoffee  
581 (M-Coffee mode [77], the alignments curated with Gblocks [78] and then translated back to  
582 nucleotide sequence using Pal2Nal [79] or TranslatorX [80]. Sequences that produced a gapless

583 alignment exceeding 100 bp in length were retained for pairwise dN/dS ( $\omega$ ) analysis using  
584 Phylogenetic Analysis by Maximum Likelihood (PAML4, CodeML, F3x4 model of codon frequencies,  
585 runmode = -2) [81]. Genes with saturated synonymous substitution values ( $dS > 2$ ) were excluded  
586 from the analysis.

587 The positive selection analysis was carried out using CodeML (PAML4, F3x4 model of codon  
588 frequencies) using additional orthologs of the 1:1 best ortholog set from OrthoMCL found in the  
589 transcriptomes of three *Ectocarpus* species (*E. fasciculatus*, an unnamed *Ectocarpus* species from  
590 New Zealand and *E. siliculosus*;) and in the genome of *Cladosiphon okamuranus* [26]. The analysis  
591 was therefore based on data from seven species in total. Protein alignment and curation was  
592 performed as described above. Gapless alignments longer than 100 bp containing sequences from  
593 at least three species were retained for subsequent analysis. CodeML paired nested site models  
594 (M1a, M2a; M7, M8) [81] of sequence evolution were used and the outputs compared using the  
595 likelihood ratio test. The second model in each pair (M2a and M8) is derived from the first by  
596 allowing variable dN/dS ratios between sites to be greater than 1, making it possible to detect  
597 positive selection at critical amino acid residues.

598 The effective number of codons (ENC) was calculated using ENCprime [82] with ribosomal  
599 genes as background nucleotide composition.

## 600 **Euclidean distances**

601 Euclidean distances were estimated for all the PSOs for each of the two orders (Ectocarpales  
602 and Laminariales) following the approach of [83]. The following formula was used:

603 
$$\text{EucD} = \sqrt{\sum_{j=1}^k (x_{1j} - x_{2j})^2}$$

604 Where  $x_{ij}$  is the expression level of the gene under consideration (TPM) in species  $i$  (i.e.  
605 species 1 or species 2) during stage  $j$  (i.e. gametophyte or sporophyte) and  $k$  is the total number of  
606 stages (i.e. two, gametophyte and sporophyte). All statistical analysis was performed using RStudio  
607 (R version 3.4.2).

608 **Stochastic mapping approach to assess the evolutionary dynamics of generation-biased**  
609 **expression**

610 We conducted an evolutionary analyses of the presence and absence of generation-biased  
611 gene expression as a dynamic between gain and loss of phyletic patterns [84]. To estimate the  
612 evolutionary dynamics of each event we tested whether the rates of gain ( $0 \rightarrow 1$ ) and loss ( $1 \rightarrow 0$ ) of  
613 bias were equal (ER model) or different (ARD model), and implemented stochastic mapping for  
614 each gene using the *phytools* R package [85]. The number of events on each branch only included  
615 those transitions that effectively produced a change of state at the start and end of the specified  
616 branch.

617 **DECLARATIONS**

618 *Ethics approval and consent to participate:* not applicable

619 *Availability of data and materials:* All data generated or analysed during this study are  
620 included in this published article and its supplementary information files. Details of SRA references  
621 for sequence data are included in Table S10. All the datasets used and analysed during the current  
622 study are also available from the corresponding author on reasonable request.

623 *Competing interests:* The authors declare that they have no competing interests.

624 *Funding:* This work was supported by the CNRS, Sorbonne Université and the ERC (grant  
625 agreement 638240). The funders had no role in study design, data collection and analysis, decision  
626 to publish, or preparation of the manuscript.

627 *Author's contributions.* AL, AFP and KK prepared the biological material and performed  
628 experiments. AL and MS performed the computational analysis. AL, MS and SMC analysed data.  
629 SMC wrote the manuscript with valuable input from AL and JMC. SMC coordinated the study. All  
630 authors read and approved the final manuscript.

631 *Acknowledgements:* The authors thank Nicolas Salemin (University of Lausanne) for fruitful  
632 discussions and advice on phylogenetic methods, Dieter Muller, Erasmo Macaya and Delphine  
633 Scornet for providing the photographs of *M. pyrifera* and *Ectocarpus* sp. shown in Figure S1.

## 634 **ADDITIONAL FILES**

635 **Additional File 1 (.xlsx): Supplemental tables.**

636 **Table S1.** Phenotypic differences between gametophytes (GA) and sporophytes (SP) of the  
637 four-studied species.

638 **Table S2.** Gametophyte- and sporophyte-biased genes identified for each of the four studied  
639 species (DEseq2 FC<2, padj<0.05, TPM>5th percentile).

640 **Table S3.** Generation-biased gene expression and morphological complexity of sporophytes  
641 and gametophytes across the four-studied species. GA: gametophyte; SP: sporophyte.

642 **Table S4.** Number of duplicated, single copy and orphan genes among the generation-biased  
643 genes in each of the studied brown algal species. SP: sporophyte; GA: gametophyte.

644 **Table S5.** Orthology statistics based on the OrthoMCL analysis. GBGs (generation-biased  
645 genes); GA (gametophyte); SP (sporophyte); PSOs (pairwise single orthologs); ASOs (all single  
646 orthologs).

647 **Table S6.** Enriched gene ontology (GO) terms associated with the generation-biased genes  
648 (GBGs) identified for each of the studied species (Fisher test  $p < 0.05$ ).

649 **Table S7.** Enrichment in GO terms common to all gametophytes and sporophytes.

650 **Table S8.** Structural characteristics of the generation-biased genes identified for each of the  
651 studied species

652 **Table S9.** PAML codeml analysis with the F3X4 substitution model. UB: unbiased; GA:  
653 gametophyte-biased, SP: sporophyte-biased.

654 **Table S10.** Strains used in this study and DNA and RNA sequencing data statistics.

655 **Additional file 2 (.doc): Supplemental Figures**

656 **Figure S1.** Brown algal species used in this study. (A) *Ectocarpus* sp. sporophyte (B) *Ectocarpus*  
657 sp. gametophyte (C) *S. lomentaria* gametophyte; (D) *S. lomentaria* sporophyte; (E) *S. japonica*  
658 sporophyte; (F) *M. pyrifera* sporophyte; (G) *S. japonica* gametophyte; (H) *M. pyrifera* gametophyte.

659 **Figure S2.** Visualisation of GO terms associated with generation-biased genes for *S.*  
660 *lomentaria* gametophytes and *S. japonica* and *M. pyrifera* sporophytes. The scatterplot shows the  
661 cluster representatives (i.e. terms remaining after the redundancy reduction) in a two-dimensional



662 space derived by applying multidimensional scaling to a matrix of the GO terms' semantic  
663 similarities [76]. Bubble colour indicates p values and bubble size indicates the number of genes  
664 assigned with each GO term.

665 **Figure S3.** Structural characteristics (% GC, %GC3, CDS size and intron number) of unbiased,  
666 gametophyte- and sporophyte-biased genes across brown algal species.

667 **Figure S4.** Structural characteristics (% GC, %GC3, CDS size and intron number) of unbiased,  
668 gametophyte- and sporophyte-biased genes across brown algal species excluding orphan genes  
669 from the datasets.

670 **Figure S5. (A)** Evolutionary rates (dN/dS) for generation-biased genes when sex-biased genes  
671 were excluded from the analysis. GA: gametophyte, SP: sporophyte; SBG: sex-biased genes. **(B and**  
672 **C)** Comparison of evolutionary rates of unbiased genes with those of genes that exhibited either  
673 conserved bias (generation-biased in both species) or species-specific bias (i.e., were generation-  
674 biased in one species but unbiased in the other) in Ectocarpales **(B)** and Laminariales **(C)**. SBGs: sex-  
675 biased genes.

676 **Figure S6.** Non-synonymous substitutions **(A)**, synonymous substitutions **(B)** and codon usage  
677 bias **(C)** for unbiased, gametophyte- and sporophyte-biased genes in the four-studied species.  
678 Different letters above the plots indicate significant differences ( $P < 0.05$ ). Statistical significance was  
679 calculated by pairwise comparisons using the Wilcoxon rank sum test with Holm adjustment.

680 **Figure S7.** Evolutionary rates (dN/dS) in Laminariales and Ectocarpales orthologous genes  
681 with different evolutionary ages. Yellow dots indicate orthologous genes that are present in the  
682 four-studied species ('old' genes, i.e., ASOs), blue dots indicate order-specific orthologous genes

683 ('young' genes, i.e. PSOs excluding ASOs). Overall, young genes evolve faster than older genes.

684 Asterisks indicate a significant difference (Wilcoxon test, p-value<0.007).

## 685 REFERENCES

- 686 1. Coelho SM, Peters AF, Charrier B, Roze D, Destombe C, Valero M, et al. Complex life cycles of multicellular  
687 eukaryotes: New approaches based on the use of model organisms. *Gene*. 2007;406:152–70.
- 688 2. Valero M, Richerd S, Perrot V, Destombe C. Evolution of alternation of haploid and diploid phases in life  
689 cycles. *Trends Ecol Evol*. 1992;7:25–9.
- 690 3. Arun A, Peters NT, Scornet D, Peters AF, Mark Cock J, Coelho SM. Non-cell autonomous regulation of life  
691 cycle transitions in the model brown alga *Ectocarpus*. *New Phytol*. 2013;197:503–10.
- 692 4. Coelho SM, Godfroy O, Arun A, Le Corguillé G, Peters AF, Cock JM. OUROBOROS is a master regulator of  
693 the gametophyte to sporophyte life cycle transition in the brown alga *Ectocarpus*. *Proc Natl Acad Sci U S A*.  
694 2011;108:11518–23.
- 695 5. Perrot V, Richerd S, Valero M. Transition from haploidy to diploidy. *Nature*. 1991;351:315–7.
- 696 6. Otto SP, Goldstein DB. Recombination and the evolution of diploidy. *Genetics*. 1992;131:745–51.
- 697 7. Rescan M, Lenormand T, Roze D. Interactions between Genetic and Ecological Effects on the Evolution of  
698 Life Cycles. *Am Nat*. 2016;187:19–34.
- 699 8. Jenkins CD. Selection and the evolution of genetic life cycles. *Genetics*. 1993;133:401–10.
- 700 9. Scott MF, Rescan M. Evolution of haploid-diploid life cycles when haploid and diploid fitnesses are not  
701 equal. *Evol Int J Org Evol*. 2017;71:215–26.
- 702 10. Mable BK, Otto SP. The evolution of life cycles with haploid and diploid phases. *BioEssays*. 1998;20:453–  
703 62.
- 704 11. Paquin CE, Adams J. Relative fitness can decrease in evolving asexual populations of *S. cerevisiae*. *Nature*.  
705 1983;306:368–70.
- 706 12. Hughes, Otto. Ecology and the Evolution of Biphasic Life Cycles. *Am Nat*. 1999;154:306–20.
- 707 13. Destombe C, Godin J, Nocher M, Richerd S, Valero M. Differences in response between haploid and  
708 diploid isomorphic phases of *Gracilaria verrucosa* (Rhodophyta: Gigartinales) exposed to artificial  
709 environmental conditions. 1993.
- 710 14. Couceiro L, Le Gac M, Hunsperger HM, Mauger S, Destombe C, Cock JM, et al. Evolution and  
711 maintenance of haploid-diploid life cycles in natural populations: The case of the marine brown alga  
712 *Ectocarpus*. *Evol Int J Org Evol*. 2015;69:1808–22.

- 713 15. Immler S, Otto SP. The evolution of sex chromosomes in organisms with separate haploid sexes.  
714 *Evolution*. 2015;69:694–708.
- 715 16. Connallon T, Knowles LL. Intergenomic conflict revealed by patterns of sex-biased gene expression.  
716 *Trends Genet TIG*. 2005;21:495–9.
- 717 17. Parsch J, Ellegren H. The evolutionary causes and consequences of sex-biased gene expression. *Nat Rev*  
718 *Genet*. 2013;14:83–7.
- 719 18. Connallon T, Clark AG. The resolution of sexual antagonism by gene duplication. *Genetics*. 2011;187:919–  
720 37.
- 721 19. Safran RJ, Vortman Y, Jenkins BR, Hubbard JK, Wilkins MR, Bradley RJ, et al. The maintenance of  
722 phenotypic divergence through sexual selection: An experimental study in barn swallows *Hirundo rustica*.  
723 *Evol Int J Org Evol*. 2016;70:2074–84.
- 724 20. Harrison PW, Wright AE, Zimmer F, Dean R, Montgomery SH, Pointer MA, et al. Sexual selection drives  
725 evolution and rapid turnover of male gene expression. *Proc Natl Acad Sci U S A*. 2015;112:4393–8.
- 726 21. Cock JM, Godfroy O, Macaisne N, Peters AF, Coelho SM. Evolution and regulation of complex life cycles:  
727 a brown algal perspective. *Curr Opin Plant Biol*. 2014;17:1–6.
- 728 22. Silberfeld T, Leigh JW, Verbruggen H, Cruaud C, de Reviers B, Rousseau F. A multi-locus time-calibrated  
729 phylogeny of the brown algae (Heterokonta, Ochrophyta, Phaeophyceae): Investigating the evolutionary  
730 nature of the “brown algal crown radiation”. *Mol Phylogenet Evol*. 2010;56:659–74.
- 731 23. Cohen O, Pupko T. Inference of gain and loss events from phyletic patterns using stochastic mapping and  
732 maximum parsimony--a simulation study. *Genome Biol Evol*. 2011;3:1265–75.
- 733 24. Conesa A, Götz S. Blast2GO: A comprehensive suite for functional analysis in plant genomics. *Int J Plant*  
734 *Genomics*. 2008;2008:619832.
- 735 25. Lipinska A, Cormier A, Luthringer R, Peters AF, Corre E, Gachon CMM, et al. Sexual dimorphism and the  
736 evolution of sex-biased gene expression in the brown alga *ectocarpus*. *Mol Biol Evol*. 2015;32:1581–97.
- 737 26. Nishitsuji K, Arimoto A, Iwai K, Sudo Y, Hisata K, Fujie M, et al. A draft genome of the brown alga,  
738 *Cladosiphon okamuranus*, S-strain: a platform for future studies of “mozuku” biology. *DNA Res Int J Rapid*  
739 *Publ Rep Genes Genomes*. 2016;23:561–70.
- 740 27. Szovenyi P, Rensing SA, Lang D, Wray GA, Shaw AJ. Generation-biased gene expression in a bryophyte  
741 model system. *Mol Biol Evol*. 2011;28:803–12.
- 742 28. Szovenyi P, Ricca M, Hock Z, Shaw JA, Shimizu KK, Wagner A. Selection is no more efficient in haploid  
743 than in diploid life stages of an angiosperm and a moss. *Mol Biol Evol*. 2013;30:1929–39.
- 744 29. Thornber CS. Functional properties of the isomorphic biphasic algal life cycle. *Integr Comp Biol*.  
745 2006;46:605–14.
- 746 30. Clayton M. N. Evolution and Life Histories of Brown Algae. *Bot Mar*. 2009;31:379.

- 747 31. Bessho K, Iwasa Y. Optimal seasonal schedules and the relative dominance of heteromorphic and  
748 isomorphic life cycles in macroalgae. *J Theor Biol.* 2010;267:201–12.
- 749 32. Luthringer R, Cormier A, Peters AF, Cock JM, Coelho SM. Sexual dimorphism in the brown algae.  
750 *Perspectives in Phycology.* 2015;1:11–25.
- 751 33. Immler S, Arnqvist G, Otto SP. Ploidally antagonistic selection maintains stable genetic polymorphism.  
752 *Evol Int J Org Evol.* 2012;66:55–65.
- 753 34. Godfroy O, Uji T, Nagasato C, Lipinska AP, Scornet D, Peters AF, et al. DISTAG/TBCCd1 Is Required for Basal  
754 Cell Fate Determination in *Ectocarpus*. *Plant Cell.* 2017;
- 755 35. Macaisne N, Liu F, Scornet D, Peters AF, Lipinska A, Perrineau M-M, et al. The *Ectocarpus* IMMEDIATE  
756 UPRIGHT gene encodes a member of a novel family of cysteine-rich proteins that have an unusual  
757 distribution across the eukaryotes. *Dev Camb Engl.* 2017;
- 758 36. Dolan L. Body building on land — morphological evolution of land plants. *Curr Opin Plant Biol.*  
759 2009;12:4–8.
- 760 37. Pires ND, Dolan L. Morphological evolution in land plants: new designs with old genes. *Philos Trans R Soc*  
761 *B Biol Sci.* 2012;367:508–18.
- 762 38. Shaw AJ, Szovenyi P, Shaw B. Bryophyte diversity and evolution: windows into the early evolution of land  
763 plants. *Am J Bot.* 2011;98:352–69.
- 764 39. Niklas KJ, Kutschera U. The evolution of the land plant life cycle. *New Phytol.* 2010;185:27–41.
- 765 40. Sano R, Juarez CM, Hass B, Sakakibara K, Ito M, Banks JA, et al. KNOX homeobox genes potentially have  
766 similar function in both diploid unicellular and multicellular meristems, but not in haploid meristems. *Evol*  
767 *Dev.* 2005;7:69–78.
- 768 41. Gossmann TI, Saleh D, Schmid MW, Spence MA, Schmid KJ. Transcriptomes of Plant Gametophytes Have  
769 a Higher Proportion of Rapidly Evolving and Young Genes than Sporophytes. *Mol Biol Evol.* 2016;33:1669–  
770 78.
- 771 42. Gerstein AC, Cleathero LA, Mandegar MA, Otto SP. Haploids adapt faster than diploids across a range of  
772 environments. *J Evol Biol.* 2011;24:531–40.
- 773 43. Orr HA, Otto SP. Does Diploidy Increase the Rate of Adaptation? *Genetics.* 1994;136:1475–80.
- 774 44. Duret L, Mouchiroud D. Determinants of substitution rates in mammalian genes: expression pattern  
775 affects selection intensity but not mutation rate. *Mol Biol Evol.* 2000;17:68–74.
- 776 45. Zhang L, Li W-H. Mammalian housekeeping genes evolve more slowly than tissue-specific genes. *Mol*  
777 *Biol Evol.* 2004;21:236–9.
- 778 46. Slotte T, Bataillon T, Hansen TT, St Onge K, Wright SI, Schierup MH. Genomic determinants of protein  
779 evolution and polymorphism in *Arabidopsis*. *Genome Biol Evol.* 2011;3:1210–9.

- 780 47. Krylov DM, Wolf YI, Rogozin IB, Koonin EV. Gene loss, protein sequence divergence, gene dispensability,  
781 expression level, and interactivity are correlated in eukaryotic evolution. *Genome Res.* 2003;13:2229–35.
- 782 48. Cherry JL. Expression Level, Evolutionary Rate, and the Cost of Expression. *Genome Biol Evol.*  
783 2010;2:757–69.
- 784 49. Pal C, Papp B, Lercher MJ. An integrated view of protein evolution. *Nat Rev Genet.* 2006;7:337–48.
- 785 50. Alvarez-Ponce D, Feyertag F, Chakraborty S. Position Matters: Network Centrality Considerably Impacts  
786 Rates of Protein Evolution in the Human Protein-Protein Interaction Network. *Genome Biol Evol.*  
787 2017;9:1742–56.
- 788 51. Hirsh AE, Fraser HB. Protein dispensability and rate of evolution. *Nature.* 2001;411:1046–9.
- 789 52. Alvarez-Ponce D, Fares MA. Evolutionary rate and duplicability in the Arabidopsis thaliana protein-protein  
790 interaction network. *Genome Biol Evol.* 2012;4:1263–74.
- 791 53. Arunkumar R, Josephs EB, Williamson RJ, Wright SI. Pollen-Specific, but Not Sperm-Specific, Genes Show  
792 Stronger Purifying Selection and Higher Rates of Positive Selection Than Sporophytic Genes in *Capsella*  
793 *grandiflora*. *Mol Biol Evol.* 2013;30:2475–86.
- 794 54. Martínez EA, Santelices B. Selective mortality on haploid and diploid microscopic stages of *Lessonia*  
795 *nigrescens* Bory (Phaeophyta, Laminariales). *J Exp Mar Biol Ecol.* 1998;229:219–39.
- 796 55. Parente MI, Neto AI, Fletcher RL. MORPHOLOGY AND LIFE HISTORY OF SCYTOSIPHON LOMENTARIA  
797 (SCYTOSIPHONACEAE, PHAEOPHYCEAE) FROM THE AZORES1. *J Phycol.* 2003;39:353–9.
- 798 56. Kogame K. A taxonomic study of Japanese Scytosiphon (Scytosiphonales, Phaeophyceae), including two  
799 new species. *Phycol Res.* 1998;46:39–56.
- 800 57. Tirosch I, Barkai N. Evolution of gene sequence and gene expression are not correlated in yeast. *Trends*  
801 *Genet.* 2008;24:109–13.
- 802 58. Liao B-Y, Weng M-P, Zhang J. Contrasting genetic paths to morphological and physiological evolution.  
803 *Proc Natl Acad Sci U S A.* 2010;107:7353–8.
- 804 59. Nuzhdin SV, Wayne ML, Harmon KL, McIntyre LM. Common pattern of evolution of gene expression level  
805 and protein sequence in *Drosophila*. *Mol Biol Evol.* 2004;21:1308–17.
- 806 60. Khaitovich P, Hellmann I, Enard W, Nowick K, Leinweber M, Franz H, et al. Parallel patterns of evolution  
807 in the genomes and transcriptomes of humans and chimpanzees. *Science.* 2005;309:1850–4.
- 808 61. Wray GA. The evolutionary significance of cis-regulatory mutations. *Nat Rev Genet.* 2007;8:206–16.
- 809 62. Lipinska AP, Toda NRT, Heesch S, Peters AF, Cock JM, Coelho SM. Multiple gene movements into and out  
810 of haploid sex chromosomes. *Genome Biol.* 2017;18:104.
- 811 63. Coelho SM, Scornet D, Rousvoal S, Peters NT, Darteville L, Peters AF, et al. How to cultivate *Ectocarpus*.  
812 *Cold Spring Harb Protoc.* 2012;2012:258–61.

- 813 64. Cormier A, Avia K, Sterck L, Derrien T, Wucher V, Andres G, et al. Re-annotation, improved large-scale  
814 assembly and establishment of a catalogue of noncoding loci for the genome of the model brown alga  
815 *Ectocarpus*. *New Phytol.* 2017;214:219–32.
- 816 65. Ye N, Zhang X, Miao M, Fan X, Zheng Y, Xu D, et al. Saccharina genomes provide novel insight into kelp  
817 biology. *Nat Commun.* 2015;6:6986.
- 818 66. Perteza M, Kim D, Perteza GM, Leek JT, Salzberg SL. Transcript-level expression analysis of RNA-seq  
819 experiments with HISAT, StringTie and Ballgown. *Nat Protoc.* 2016;11:1650–67.
- 820 67. Bolger AM, Lohse M, Usadel B. Trimmomatic: a flexible trimmer for Illumina sequence data. *Bioinforma*  
821 *Oxf Engl.* 2014;30:2114–20.
- 822 68. Cock JM, Sterck L, Rouzé P, Scornet D, Allen AE, Amoutzias G, et al. The *Ectocarpus* genome and the  
823 independent evolution of multicellularity in brown algae. *Nature.* 2010;465:617–21.
- 824 69. Trapnell C, Pachter L, Salzberg SL. TopHat: discovering splice junctions with RNA-Seq. *Bioinforma Oxf*  
825 *Engl.* 2009;25:1105–11.
- 826 70. Langmead B, Salzberg SL. Fast gapped-read alignment with Bowtie 2. *Nat Methods.* 2012;9:357–9.
- 827 71. Kim D, Perteza G, Trapnell C, Pimentel H, Kelley R, Salzberg SL. TopHat2: accurate alignment of  
828 transcriptomes in the presence of insertions, deletions and gene fusions. *Genome Biol.* 2013;14:R36.
- 829 72. Radakovits R, Jinkerson RE, Fuerstenberg SI, Tae H, Settlege RE, Boore JL, et al. Draft genome sequence  
830 and genetic transformation of the oleaginous alga *Nannochloropsis gaditana*. *Nat Commun.* 2012;3:686.
- 831 73. Gobler CJ, Berry DL, Dyhrman ST, Wilhelm SW, Salamov A, Lobanov AV, et al. Niche of harmful alga  
832 *Aureococcus anophagefferens* revealed through ecogenomics. *Proc Natl Acad Sci U S A.* 2011;108:4352–7.
- 833 74. Armbrust EV, Berges JA, Bowler C, Green BR, Martinez D, Putnam NH, et al. The genome of the diatom  
834 *Thalassiosira pseudonana*: ecology, evolution, and metabolism. *Science.* 2004;306:79–86.
- 835 75. Zdobnov EM, Apweiler R. InterProScan--an integration platform for the signature-recognition methods  
836 in InterPro. *Bioinforma Oxf Engl.* 2001;17:847–8.
- 837 76. Supek F, Bošnjak M, Škunca N, Šmuc T. REVIGO Summarizes and Visualizes Long Lists of Gene Ontology  
838 Terms. *PLOS ONE.* 2011;6:e21800.
- 839 77. Notredame C, Higgins DG, Heringa J. T-Coffee: A novel method for fast and accurate multiple sequence  
840 alignment. *J Mol Biol.* 2000;302:205–17.
- 841 78. Castresana J. Selection of conserved blocks from multiple alignments for their use in phylogenetic  
842 analysis. *Mol Biol Evol.* 2000;17:540–52.
- 843 79. Suyama M, Torrents D, Bork P. PAL2NAL: robust conversion of protein sequence alignments into the  
844 corresponding codon alignments. *Nucleic Acids Res.* 2006;34:W609–612.
- 845 80. Abascal F, Zardoya R, Telford MJ. TranslatorX: multiple alignment of nucleotide sequences guided by  
846 amino acid translations. *Nucleic Acids Res.* 2010;38:W7–13.

- 847 81. Yang Z. PAML 4: phylogenetic analysis by maximum likelihood. *Mol Biol Evol.* 2007;24:1586–91.
- 848 82. Satapathy SS, Sahoo AK, Ray SK, Ghosh TC. Codon degeneracy and amino acid abundance influence the  
849 measures of codon usage bias: improved Nc (Nc ) and ENCprime (N(')c ) measures. *Genes Cells Devoted Mol*  
850 *Cell Mech.* 2017;22:277–83.
- 851 83. Pereira V, Waxman D, Eyre-Walker A. A problem with the correlation coefficient as a measure of gene  
852 expression divergence. *Genetics.* 2009;183:1597–600.
- 853 84. Cohen O, Ashkenazy H, Belinky F, Huchon D, Pupko T. GLOOME: gain loss mapping engine. *Bioinformatics.*  
854 2010;26:2914–5.
- 855 85. Revell LJ. phytools: an R package for phylogenetic comparative biology (and other things). *Methods Ecol*  
856 *Evol.* 2012;3:217–23.
- 857
- 858
